# Supplementary material
Source: MDPI journal article supplement (https://www.mdpi.com/1999-4907/12/7/928)
Supplement: s1 [file s1]

**Article title:** Phytochemical screening of volatile organic compounds in three common coniferous tree species in terms of forest ecosystem services

**Journal name:** Forests

**Author names:** Martina Zorić, Saša Kostić, Nebojša Kladar, Biljana Božin, Verica Vasić, Marko Kebert, Saša Orlović

**Corresponding author:** Martina Zorić, University of Novi Sad, Institute of Lowland Forestry and Environment, Antona Čehova 13d, 21000 Novi Sad, Serbia. e-mail: martinazoric@uns.ac.rs

**Table S1.** BVOCs content in *Pinus nigra* presented as the mean values (%) with SD (%) and CV (%). Values detected in tested genotypes (Gen 1; Gen 2; Gen 3); The data shows content of primary BVOCs determined in fresh herbal material (Headspace-GC/MS 1\*) and essential oils determined in essential oil (GC/MS Fresh\*\* and GC/MS Dry\*\*\*)

| Species                 | RI  | Pinus nigra* |        |        | Pinus nigra** |        |        | Pinus nigra*** |        |        | MEAN (%) | SD (%) | CV (%) |
|-------------------------|-----|--------------|--------|--------|---------------|--------|--------|----------------|--------|--------|----------|--------|--------|
| Genotype                |     | Gen. 1       | Gen. 2 | Gen. 3 | Gen. 1        | Gen. 2 | Gen. 3 | Gen. 1         | Gen. 2 | Gen. 3 |          |        |        |
| Monoterpene             |     |              | 89.4   |        |               |        |        |                |        |        |          | 29.4   |        |
| Hydrocarbons            |     | 90.07        | 5      | 88.69  | 24.61         | 24.54  | 24.53  | 28.17          | 30.6   | 30.41  | 47.90    | 3      | 0.61   |
|                         |     |              | 78.7   |        |               |        |        |                |        |        |          | 28.2   |        |
| $\alpha$ -Pinene        | 937 | 78.56        | 3      | 77.65  | 16.42         | 16.37  | 16.28  | 19.56          | 22.02  | 21.05  | 38.52    | 1      | 0.73   |
| Camphene                | 952 | 2.54         | 2.45   | 2.34   | 0.42          | 0.59   | 0.56   | 1.15           | 1.12   | 1.23   | 1.38     | 0.80   | 0.58   |
| $\beta$ -Pinene         | 979 | 3.36         | 2.92   | 2.41   | 3.15          | 3.27   | 3.17   | 2.64           | 2.83   | 3.23   | 3.00     | 0.30   | 0.10   |
| $\beta$ -Myrcene        | 991 | 2.08         | 1.49   | 1.91   | 0.44          | 0.43   | 0.49   | 0.94           | 0.95   | 0.92   | 1.07     | 0.59   | 0.55   |
| $\alpha$ -Phellandrene  | 100 |              |        |        |               |        |        |                |        |        |          |        |        |
|                         | 5   | 0.00         | 0.00   | 0.00   | 0.05          | 0.06   | 0.07   | 0.14           | 0.09   | 0.08   | 0.05     | 0.05   | 0.83   |
| 3-Carene                | 101 |              |        |        |               |        |        |                |        |        |          |        |        |
|                         | 1   | 0.00         | 0.00   | 0.00   | 1.78          | 1.39   | 1.43   | 0.24           | 0.19   | 0.12   | 0.57     | 0.69   | 1.21   |
| $\alpha$ -Terpinene     | 101 |              |        |        |               |        |        |                |        |        |          |        |        |
|                         | 7   | 0.00         | 0.00   | 0.00   | 0.00          | 0.00   | 0.00   | 0.00           | 0.00   | 0.00   | 0.00     | 0.00   | 0.00   |
| o-Cymene                | 102 |              |        |        |               |        |        |                |        |        |          |        |        |
|                         | 2   | 0.00         | 0.00   | 0.00   | 0.06          | 0.05   | 0.08   | 0.11           | 0.12   | 0.14   | 0.06     | 0.05   | 0.83   |
| Limonene                | 103 |              |        |        |               |        |        |                |        |        |          |        |        |
|                         | 0   | 2.22         | 2.42   | 2.81   | 0.94          | 1.18   | 1.07   | 1.74           | 1.95   | 2.11   | 1.83     | 0.61   | 0.33   |
| $\beta$ -Ocimene        | 103 |              |        |        |               |        |        |                |        |        |          |        |        |
|                         | 7   | 0.32         | 0.57   | 0.52   | 0.41          | 0.59   | 0.61   | 0.83           | 0.93   | 0.87   | 0.63     | 0.20   | 0.31   |
| $\gamma$ -Terpinene     | 106 |              |        |        |               |        |        |                |        |        |          |        |        |
|                         | 0   | 0.00         | 0.00   | 0.00   | 0.06          | 0.04   | 0.09   | 0.14           | 0.11   | 0.13   | 0.06     | 0.05   | 0.85   |
| Terpinolene             | 108 |              |        |        |               |        |        |                |        |        |          |        |        |
|                         | 8   | 0.99         | 0.87   | 1.05   | 0.88          | 0.57   | 0.68   | 0.68           | 0.29   | 0.53   | 0.73     | 0.23   | 0.32   |
| Oxygenated Monoterpenes |     |              |        |        |               |        |        |                |        |        |          |        |        |
|                         |     | 0.00         | 0.00   | 0.00   | 4.33          | 3.98   | 3.91   | 7.47           | 7.67   | 6.22   | 3.73     | 2.94   | 0.79   |
| 1,8-Cineole             | 103 |              |        |        |               |        |        |                |        |        |          |        |        |
|                         | 2   | 0.00         | 0.00   | 0.00   | 0.00          | 0.00   | 0.00   | 0.00           | 0.00   | 0.00   | 0.00     | 0.00   | 0.00   |
| Linalool                | 109 |              |        |        |               |        |        |                |        |        |          |        |        |
|                         | 9   | 0.00         | 0.00   | 0.00   | 0.32          | 0.29   | 0.26   | 0.14           | 0.16   | 0.12   | 0.14     | 0.12   | 0.83   |
| Camphor                 | 114 |              |        |        |               |        |        |                |        |        |          |        |        |
|                         |     | 0.00         | 0.00   | 0.00   | 0.65          | 0.57   | 0.46   | 0.49           | 0.45   | 0.39   | 0.33     | 0.25   | 0.74   |

|                             |          |      |      |       |       |       |       |       |       |       |       |              |      |
|-----------------------------|----------|------|------|-------|-------|-------|-------|-------|-------|-------|-------|--------------|------|
|                             | 5        |      |      |       |       |       |       |       |       |       |       |              |      |
| Camphene hydrate            | 114<br>8 | 0.00 | 0.00 | 0.00  | 0.18  | 0.15  | 0.13  | 0.12  | 0.17  | 0.14  | 0.10  | 0.07         | 0.73 |
| Isoborneol                  | 115<br>7 | 0.00 | 0.00 | 0.00  | 0.00  | 0.00  | 0.00  | 0.00  | 0.00  | 0.00  | 0.00  | 0.00         | 0.00 |
| Pinocarvone                 | 116<br>4 | 0.00 | 0.00 | 0.00  | 0.13  | 0.28  | 0.27  | 0.94  | 0.86  | 0.72  | 0.36  | 0.36         | 1.01 |
| endo-Borneol                | 116<br>7 | 0.00 | 0.00 | 0.00  | 0.00  | 0.00  | 0.00  | 0.13  | 0.11  | 0.12  | 0.04  | 0.06         | 1.42 |
| Terpinen-4-ol               | 117<br>7 | 0.00 | 0.00 | 0.00  | 0.65  | 0.59  | 0.47  | 0.48  | 0.48  | 0.41  | 0.34  | 0.25         | 0.73 |
| $\alpha$ -Terpineol         | 118<br>9 | 0.00 | 0.00 | 0.00  | 0.07  | 0.09  | 0.12  | 0.27  | 0.31  | 0.34  | 0.13  | 0.13         | 0.97 |
| Citronellol                 | 122<br>8 | 0.00 | 0.00 | 0.00  | 0.00  | 0.00  | 0.00  | 0.00  | 0.00  | 0.00  | 0.00  | 0.00         | 0.00 |
| Bornyl acetate              | 128<br>5 | 0.00 | 0.00 | 0.00  | 1.25  | 1.09  | 1.19  | 1.57  | 1.69  | 1.16  | 0.88  | 0.65         | 0.74 |
| $\alpha$ - Terpinyl acetate | 135<br>0 | 0.00 | 0.00 | 0.00  | 0.24  | 0.23  | 0.25  | 2.43  | 2.55  | 2.01  | 0.86  | 1.05         | 1.23 |
| Eugenol                     | 135<br>7 | 0.00 | 0.00 | 0.00  | 0.00  | 0.00  | 0.00  | 0.00  | 0.00  | 0.00  | 0.00  | 0.00         | 0.00 |
| trans-Pinocarvyl acetate    | 129<br>7 | 0.00 | 0.00 | 0.00  | 0.15  | 0.12  | 0.14  | 0.26  | 0.29  | 0.25  | 0.13  | 0.11         | 0.81 |
| (-)-Myrtenol                | 121<br>3 | 0.00 | 0.00 | 0.00  | 0.41  | 0.36  | 0.39  | 0.43  | 0.41  | 0.38  | 0.26  | 0.19         | 0.71 |
| Myrtenyl acetate            | 132<br>7 | 0.00 | 0.00 | 0.00  | 0.28  | 0.21  | 0.23  | 0.21  | 0.19  | 0.18  | 0.14  | 0.11<br>24.1 | 0.73 |
| Sesquiterpene hydrocarbons  |          | 9.04 | 10.2 | 10.57 | 60.99 | 66.33 | 65.1  | 58.44 | 55.74 | 58.13 | 43.84 | 8            | 0.55 |
| $\alpha$ -Copaene           | 137<br>7 | 0.00 | 0.00 | 0.00  | 0.22  | 0.45  | 0.37  | 0.26  | 0.19  | 0.18  | 0.19  | 0.15         | 0.83 |
| $\alpha$ -Cubebene          | 137<br>7 | 0.00 | 0.00 | 0.00  | 0.38  | 0.25  | 0.32  | 0.34  | 0.46  | 0.42  | 0.24  | 0.18         | 0.74 |
| Longifolene                 | 140<br>5 | 0.00 | 0.00 | 0.00  | 0.00  | 0.00  | 0.00  | 0.00  | 0.00  | 0.00  | 0.00  | 0.00         | 0.00 |
| trans-Caryophyllene         | 141<br>9 | 3.25 | 4.46 | 4.61  | 13.62 | 16.98 | 14.76 | 12.68 | 13.51 | 13.64 | 10.83 | 4.90         | 0.45 |
| $\beta$ -Copaene            | 143<br>2 | 0.00 | 0.00 | 0.00  | 0.52  | 0.64  | 0.61  | 0.49  | 0.52  | 0.58  | 0.37  | 0.27         | 0.72 |
| cis- $\beta$ -Farnesene     | 144<br>4 | 0.00 | 0.00 | 0.00  | 0.56  | 0.53  | 0.51  | 0.37  | 0.33  | 0.36  | 0.30  | 0.22         | 0.75 |
| Humulene                    | 145<br>4 | 0.38 | 0.58 | 0.71  | 3.07  | 4.42  | 5.47  | 3.16  | 4.62  | 4.37  | 2.98  | 1.84         | 0.62 |
| allo-Aromadendrene          | 146<br>0 | 0.00 | 0.00 | 0.00  | 0.08  | 0.07  | 0.05  | 0.09  | 0.11  | 0.12  | 0.06  | 0.05         | 0.78 |
| $\gamma$ -Gurjunene         | 147<br>3 | 0.00 | 0.00 | 0.00  | 0.00  | 0.00  | 0.00  | 0.00  | 0.00  | 0.00  | 0.00  | 0.00         | 0.00 |
| $\gamma$ -Muuroloene        | 147<br>7 | 0.38 | 0.21 | 0.27  | 1.25  | 1.73  | 1.48  | 1.09  | 0.98  | 0.96  | 0.93  | 0.51         | 0.55 |
| $\gamma$ -Himachalene       | 147<br>7 | 0.00 | 0.00 | 0.00  | 0.00  | 0.00  | 0.00  | 0.00  | 0.00  | 0.00  | 0.00  | 0.00         | 0.00 |
| Germacrene D                | 148<br>1 | 4.24 | 4.17 | 4.27  | 28.42 | 29.37 | 28.78 | 26.95 | 25.16 | 25.41 | 19.64 | 10.9<br>8    | 0.56 |
| $\alpha$ - Muuroloene       | 149<br>9 | 0.26 | 0.31 | 0.28  | 4.62  | 3.89  | 4.18  | 3.12  | 2.51  | 2.83  | 2.44  | 1.65         | 0.67 |
| $\alpha$ - Farnesene        | 150<br>8 | 0.00 | 0.00 | 0.00  | 0.49  | 0.53  | 0.42  | 0.49  | 0.44  | 0.45  | 0.31  | 0.22         | 0.71 |
| $\beta$ - Cadinene          | 151<br>8 | 0.53 | 0.47 | 0.43  | 7.03  | 6.82  | 7.63  | 8.67  | 6.27  | 8.13  | 5.11  | 3.34         | 0.65 |
| $\alpha$ -Calacorene        | 154<br>2 | 0.00 | 0.00 | 0.00  | 0.73  | 0.65  | 0.52  | 0.73  | 0.64  | 0.68  | 0.44  | 0.32         | 0.72 |
| $\gamma$ -Cadinene          | 151<br>3 | 0.00 | 0.00 | 0.00  | 0.00  | 0.00  | 0.00  | 0.00  | 0.00  | 0.00  | 0.00  | 0.00         | 0.00 |
| Cubebol                     | 151<br>6 | 0.00 | 0.00 | 0.00  | 0.00  | 0.00  | 0.00  | 0.00  | 0.00  | 0.00  | 0.00  | 0.00         | 0.00 |
| Oxygenated sesquiterpenes   |          | 0.00 | 0.00 | 0.00  | 6.03  | 4.882 | 6.06  | 5.84  | 5.93  | 5.71  | 3.83  | 2.73         | 0.71 |

|                                                   |          |        |           |            |            |            |            |            |            |            |      |      |      |
|---------------------------------------------------|----------|--------|-----------|------------|------------|------------|------------|------------|------------|------------|------|------|------|
| trans -<br>Nerolidol                              | 456<br>4 | 0.00   | 0.00      | 0.00       | 0.14       | 0.012      | 0.17       | 0.12       | 0.17       | 0.15       | 0.08 | 0.07 | 0.88 |
| Spathulenol                                       | 157<br>6 | 0.00   | 0.00      | 0.00       | 0.23       | 0.19       | 0.21       | 0.38       | 0.29       | 0.31       | 0.18 | 0.14 | 0.77 |
| caryophyllene<br>oxide                            | 158<br>1 | 0.00   | 0.00      | 0.00       | 0.86       | 0.57       | 0.83       | 0.85       | 0.86       | 0.82       | 0.53 | 0.39 | 0.72 |
| Cubenol                                           | 164<br>2 | 0.00   | 0.00      | 0.00       | 0.21       | 0.19       | 0.11       | 0.22       | 0.24       | 0.21       | 0.13 | 0.10 | 0.75 |
| Epicubenol                                        | 162<br>7 | 0.00   | 0.00      | 0.00       | 0.24       | 0.21       | 0.19       | 0.18       | 0.15       | 0.17       | 0.13 | 0.09 | 0.73 |
| epi- $\alpha$ -muurolol                           | 164<br>2 | 0.00   | 0.00      | 0.00       | 1.83       | 1.57       | 1.92       | 1.62       | 1.56       | 1.49       | 1.11 | 0.80 | 0.72 |
| $\alpha$ -Cadinol                                 | 165<br>3 | 0.00   | 0.00      | 0.00       | 1.53       | 1.36       | 1.57       | 1.23       | 1.31       | 1.29       | 0.92 | 0.66 | 0.72 |
| Aliphatic<br>compounds                            |          | 0.00   | 0.00      | 0.00       | 0.99       | 0.78       | 1.06       | 1.24       | 1.35       | 1.27       | 0.74 | 0.55 | 0.74 |
| Nonanal                                           | 110<br>4 | 0.00   | 0.00      | 0.00       | 0.00       | 0.00       | 0.00       | 0.00       | 0.00       | 0.00       | 0.00 | 0.00 | 0.00 |
| n-Dodecanol                                       | 147<br>2 | 0.00   | 0.00      | 0.00       | 0.16       | 0.12       | 0.19       | 0.21       | 0.19       | 0.17       | 0.12 | 0.08 | 0.74 |
| Hexadecane                                        | 160<br>0 | 0.00   | 0.00      | 0.00       | 0.59       | 0.47       | 0.61       | 0.72       | 0.69       | 0.71       | 0.42 | 0.31 | 0.73 |
| Heptadecane                                       | 170<br>0 | 0.00   | 0.00      | 0.00       | 0.24       | 0.19       | 0.26       | 0.31       | 0.47       | 0.39       | 0.21 | 0.17 | 0.80 |
| Nonadecane                                        | 190<br>0 | 0.00   | 0.00      | 0.00       | 0.00       | 0.00       | 0.00       | 0.00       | 0.00       | 0.00       | 0.00 | 0.00 | 0.00 |
| Eicosane                                          | 200<br>0 | 0.00   | 0.00      | 0.00       | 0.00       | 0.00       | 0.00       | 0.00       | 0.00       | 0.00       | 0.00 | 0.00 | 0.00 |
| Heneicosane                                       | 210<br>0 | 0.00   | 0.00      | 0.00       | 0.00       | 0.00       | 0.00       | 0.00       | 0.00       | 0.00       | 0.00 | 0.00 | 0.00 |
| <b>TOTAL OF<br/>IDENTIFIED<br/>COMPOUND<br/>S</b> |          | 198.22 | 199.<br>2 | 198.5<br>2 | 192.9<br>1 | 200.2<br>4 | 200.2<br>6 | 201.0<br>8 | 201.2<br>3 | 202.2<br>1 |      |      |      |

**Table S2.** BVOCs content in *Pinus sylvestris* presented as the mean values with SD and CV.

Values detected in tested genotypes (Gen 1; Gen 2; Gen 3); The data shows content of primary BVOCs determined in fresh herbal material (Headspace-GC/MS 1\*) and essential oils determined in essential oil (GC/MS Fresh\*\* and GC/MS Dry\*\*\*)

| Species                    | RI   | Pinus sylvestris* |        |        | Pinus sylvestris** |        |        | Pinus sylvestris*** |        |        | MEAN (%) | SD (%) | CV (%) |
|----------------------------|------|-------------------|--------|--------|--------------------|--------|--------|---------------------|--------|--------|----------|--------|--------|
| Genotype                   |      | Gen. 1            | Gen. 2 | Gen. 3 | Gen. 1             | Gen. 2 | Gen. 3 | Gen. 1              | Gen. 2 | Gen. 3 |          |        |        |
| Monoterpene Hydrocarbons   |      | 91.72             | 92.99  | 93.66  | 93.36              | 91.52  | 93.18  | 26.09               | 27.72  | 33.04  | 71.48    | 30.13  | 0.42   |
| $\alpha$ -Pinene           | 937  | 61.76             | 64.22  | 60.27  | 64.04              | 64.31  | 65.85  | 14.1                | 16.07  | 17.59  | 47.58    | 22.45  | 0.47   |
| Camphene                   | 952  | 6.32              | 5.19   | 10.01  | 7.72               | 7.2    | 6.75   | 1.27                | 1.32   | 2.31   | 5.34     | 2.90   | 0.54   |
| $\beta$ -Pinene            | 979  | 15.52             | 15.07  | 15.68  | 13.49              | 16.06  | 14.21  | 5.33                | 6.17   | 8.23   | 12.20    | 4.10   | 0.34   |
| $\beta$ -Myrcene           | 991  | 2.09              | 2.19   | 2.7    | 2.15               | 0.84   | 1.12   | 1.35                | 0.95   | 1.33   | 1.64     | 0.62   | 0.38   |
| $\alpha$ -Phellandrene     | 1005 | 0.11              | 0.2    | 0.19   | 0.21               | 0.18   | 0.19   | 0.06                | 0.05   | 0.08   | 0.14     | 0.06   | 0.44   |
| 3-Carene                   | 1011 | 2.28              | 2.76   | 1.97   | 2.25               | 0.79   | 1.92   | 1.22                | 1.36   | 1.75   | 1.81     | 0.57   | 0.32   |
| $\alpha$ -Terpinene        | 1017 | 0.00              | 0.00   | 0.00   | 0.00               | 0.00   | 0.00   | 0.00                | 0.00   | 0.00   | 0.00     | 0.00   | 0.00   |
| o-Cymene                   | 1022 | 0.00              | 0.00   | 0.00   | 0.00               | 0.00   | 0.00   | 0.00                | 0.00   | 0.00   | 0.00     | 0.00   | 0.00   |
| Limonene                   | 1030 | 2.08              | 2.1    | 2.21   | 2.13               | 1.3    | 2.08   | 1.86                | 0.97   | 0.79   | 1.72     | 0.52   | 0.30   |
| $\beta$ -Ocimene           | 1037 | 1.18              | 0.94   | 0.19   | 0.83               | 0.25   | 0.49   | 0.47                | 0.35   | 0.42   | 0.57     | 0.32   | 0.56   |
| $\gamma$ -Terpinene        | 1060 | 0.11              | 0.09   | 0.12   | 0.13               | 0.12   | 0.15   | 0.06                | 0.09   | 0.07   | 0.10     | 0.03   | 0.26   |
| Terpinolene                | 1088 | 0.27              | 0.23   | 0.32   | 0.41               | 0.47   | 0.42   | 0.37                | 0.39   | 0.47   | 0.37     | 0.08   | 0.21   |
| Oxygenated Monoterpenes    |      | 0.15              | 0.09   | 0.1    | 0.11               | 0.08   | 0.12   | 5.13                | 4.58   | 6.1    | 1.83     | 2.46   | 1.35   |
| 1,8-Cineole                | 1032 | 0.00              | 0.00   | 0.00   | 0.00               | 0.00   | 0.00   | 0.00                | 0.00   | 0.00   | 0.00     | 0.00   | 0.00   |
| Linalool                   | 1099 | 0.00              | 0.00   | 0.00   | 0.00               | 0.00   | 0.00   | 0.14                | 0.11   | 0.13   | 0.04     | 0.06   | 1.42   |
| Camphor                    | 1145 | 0.00              | 0.00   | 0.00   | 0.00               | 0.00   | 0.00   | 0.16                | 0.15   | 0.17   | 0.05     | 0.08   | 1.42   |
| Camphene hydrate           | 1148 | 0.00              | 0.00   | 0.00   | 0.00               | 0.00   | 0.00   | 0.00                | 0.00   | 0.00   | 0.00     | 0.00   | 0.00   |
| Isoborneol                 | 1157 | 0.00              | 0.00   | 0.00   | 0.00               | 0.00   | 0.00   | 0.00                | 0.00   | 0.00   | 0.00     | 0.00   | 0.00   |
| Pinocarvone                | 1164 | 0.00              | 0.00   | 0.00   | 0.00               | 0.00   | 0.00   | 0.11                | 0.18   | 0.16   | 0.05     | 0.07   | 1.45   |
| endo-Borneol               | 1167 | 0.00              | 0.00   | 0.00   | 0.00               | 0.00   | 0.00   | 0.00                | 0.00   | 0.00   | 0.00     | 0.00   | 0.00   |
| Terpinen-4-ol              | 1177 | 0.00              | 0.00   | 0.00   | 0.00               | 0.00   | 0.00   | 0.21                | 0.15   | 0.14   | 0.06     | 0.08   | 1.45   |
| $\alpha$ -Terpineol        | 1189 | 0.15              | 0.09   | 0.1    | 0.11               | 0.08   | 0.12   | 0.48                | 0.41   | 0.43   | 0.22     | 0.16   | 0.72   |
| Citronellol                | 1228 | 0.00              | 0.00   | 0.00   | 0.00               | 0.00   | 0.00   | 0.00                | 0.00   | 0.00   | 0.00     | 0.00   | 0.00   |
| Bornyl acetate             | 1285 | 0.00              | 0.00   | 0.00   | 0.00               | 0.00   | 0.00   | 3.74                | 3.27   | 4.79   | 1.31     | 1.89   | 1.44   |
| $\alpha$ -Terpinyl acetate | 1350 | 0.00              | 0.00   | 0.00   | 0.00               | 0.00   | 0.00   | 0.00                | 0.00   | 0.00   | 0.00     | 0.00   | 0.00   |
| Eugenol                    | 1357 | 0.00              | 0.00   | 0.00   | 0.00               | 0.00   | 0.00   | 0.00                | 0.00   | 0.00   | 0.00     | 0.00   | 0.00   |
| trans-Pinocarvyl acetate   | 1297 | 0.00              | 0.00   | 0.00   | 0.00               | 0.00   | 0.00   | 0.29                | 0.31   | 0.28   | 0.10     | 0.14   | 1.42   |

|                               |      |       |        |        |       |        |       |        |        |        |        |        |       |
|-------------------------------|------|-------|--------|--------|-------|--------|-------|--------|--------|--------|--------|--------|-------|
| (-)-Myrtenol                  | 1213 | 0.00  | 0.00   | 0.00   | 0.00  | 0.00   | 0.00  | 0.00   | 0.00   | 0.00   | 0.00   | 0.00   | 0.00  |
| Myrtenyl acetate              | 1327 | 0.00  | 0.00   | 0.00   | 0.00  | 0.00   | 0.00  | 0.00   | 0.00   | 0.00   | 0.00   | 0.00   | 0.00  |
| Sesquiterpene hydrocarbons    |      | 6.83  | 6.46   | 5.5    | 5.38  | 5.46   | 5.15  | 47.72  | 47.25  | 45.13  | 19.43  | 19.30  | 0.99  |
| $\alpha$ -Copaene             | 1377 | 0.25  | 0.24   | 0.14   | 0.21  | 0.19   | 0.22  | 2.73   | 2.75   | 2.49   | 1.02   | 1.16   | 1.13  |
| $\alpha$ -Cubebene            | 1377 | 0.08  | 0.11   | 0.14   | 0.13  | 0.17   | 0.13  | 0.84   | 0.86   | 0.91   | 0.37   | 0.35   | 0.94  |
| Longifolene                   | 1405 | 0.00  | 0.00   | 0.00   | 0.00  | 0.00   | 0.00  | 0.00   | 0.00   | 0.00   | 0.00   | 0.00   | 0.00  |
| trans-Caryophyllene           | 1419 | 2.81  | 2.89   | 2.25   | 2.21  | 2.11   | 1.52  | 6.18   | 7.36   | 6.43   | 3.75   | 2.11   | 0.56  |
| $\beta$ -Copaene              | 1432 | 0.00  | 0.00   | 0.00   | 0.00  | 0.00   | 0.00  | 0.00   | 0.00   | 0.00   | 0.00   | 0.00   | 0.00  |
| cis- $\beta$ -Farnesene       | 1444 | 0.00  | 0.00   | 0.00   | 0.00  | 0.00   | 0.00  | 0.00   | 0.00   | 0.00   | 0.00   | 0.00   | 0.00  |
| Humulene                      | 1454 | 0.38  | 0.44   | 0.31   | 0.29  | 0.41   | 0.36  | 3.79   | 4.17   | 3.74   | 1.54   | 1.67   | 1.08  |
| allo-Aromadendrene            | 1460 | 0.12  | 0.13   | 0.12   | 0.16  | 0.09   | 0.11  | 0.83   | 0.79   | 0.81   | 0.35   | 0.33   | 0.93  |
| $\gamma$ -Gurjunene           | 1473 | 0.69  | 0.56   | 0.67   | 0.53  | 0.62   | 0.59  | 0.28   | 0.31   | 0.38   | 0.51   | 0.14   | 0.28  |
| $\gamma$ -Muurolene           | 1477 | 0.00  | 0.00   | 0.00   | 0.00  | 0.00   | 0.00  | 11.62  | 11.11  | 11.48  | 3.80   | 5.38   | 1.41  |
| $\gamma$ -Himachalene         | 1477 | 0.00  | 0.00   | 0.00   | 0.00  | 0.00   | 0.00  | 0.00   | 0.00   | 0.00   | 0.00   | 0.00   | 0.00  |
| Germacrene D                  | 1481 | 0.34  | 0.23   | 0.29   | 0.31  | 0.28   | 0.31  | 2.06   | 1.98   | 1.16   | 0.77   | 0.72   | 0.93  |
| $\alpha$ -Muurolene           | 1499 | 0.23  | 0.24   | 0.29   | 0.24  | 0.27   | 0.23  | 2.71   | 2.61   | 2.86   | 1.08   | 1.17   | 1.09  |
| $\alpha$ -Farnesene           | 1508 | 0.29  | 0.19   | 0.14   | 0.11  | 0.09   | 0.17  | 1.92   | 1.87   | 1.69   | 0.72   | 0.79   | 1.10  |
| $\beta$ -Cadinene             | 1518 | 1.64  | 1.43   | 1.15   | 1.19  | 1.23   | 1.51  | 1.75   | 1.64   | 1.59   | 1.46   | 0.21   | 0.14  |
| $\alpha$ -Calacorene          | 1542 | 0.00  | 0.00   | 0.00   | 0.00  | 0.00   | 0.00  | 0.82   | 0.79   | 0.75   | 0.26   | 0.37   | 1.42  |
| $\gamma$ -Cadinene            | 1513 | 0.00  | 0.00   | 0.00   | 0.00  | 0.00   | 0.00  | 7.84   | 7.1    | 6.47   | 2.38   | 3.38   | 1.42  |
| Cubebol                       | 1516 | 0.00  | 0.00   | 0.00   | 0.00  | 0.00   | 0.00  | 4.35   | 3.91   | 4.37   | 1.40   | 1.99   | 1.42  |
| Oxygenated sesquiterpenes     |      | 0.00  | 0.00   | 0.00   | 0.00  | 0.00   | 0.00  | 20.3   | 20.37  | 19.06  | 6.64   | 9.39   | 1.42  |
| trans - Nerolidol             | 4564 | 0.00  | 0.00   | 0.00   | 0.00  | 0.00   | 0.00  | 1.03   | 1.11   | 1.05   | 0.35   | 0.50   | 1.42  |
| Spathulenol                   | 1576 | 0.00  | 0.00   | 0.00   | 0.00  | 0.00   | 0.00  | 0.77   | 0.65   | 0.96   | 0.26   | 0.38   | 1.44  |
| caryophyllene oxide           | 1581 | 0.00  | 0.00   | 0.00   | 0.00  | 0.00   | 0.00  | 1.41   | 1.52   | 1.48   | 0.49   | 0.69   | 1.42  |
| Cubenol                       | 1642 | 0.00  | 0.00   | 0.00   | 0.00  | 0.00   | 0.00  | 1.18   | 1.21   | 1.19   | 0.40   | 0.56   | 1.41  |
| Epicubenol                    | 1627 | 0.00  | 0.00   | 0.00   | 0.00  | 0.00   | 0.00  | 1.04   | 1.02   | 1.01   | 0.34   | 0.48   | 1.41  |
| epi- $\alpha$ -muurolol       | 1642 | 0.00  | 0.00   | 0.00   | 0.00  | 0.00   | 0.00  | 4.38   | 4.57   | 3.98   | 1.44   | 2.04   | 1.42  |
| $\alpha$ -Cadinol             | 1653 | 0.00  | 0.00   | 0.00   | 0.00  | 0.00   | 0.00  | 7.11   | 7.13   | 6.29   | 2.28   | 3.23   | 1.42  |
| Aliphatic compounds           |      | 0.00  | 0.00   | 0.00   | 0.00  | 0.00   | 0.00  | 1.69   | 1.58   | 1.55   | 0.54   | 0.76   | 1.42  |
| Nonanal                       | 1104 | 0.00  | 0.00   | 0.00   | 0.00  | 0.00   | 0.00  | 0.00   | 0.00   | 0.00   | 0.00   | 0.00   | 0.00  |
| n-Dodecanol                   | 1472 | 0.00  | 0.00   | 0.00   | 0.00  | 0.00   | 0.00  | 0.74   | 0.69   | 0.72   | 0.24   | 0.34   | 1.42  |
| Hexadecane                    | 1600 | 0.00  | 0.00   | 0.00   | 0.00  | 0.00   | 0.00  | 0.48   | 0.51   | 0.49   | 0.16   | 0.23   | 1.41  |
| Heptadecane                   | 1700 | 0.00  | 0.00   | 0.00   | 0.00  | 0.00   | 0.00  | 0.00   | 0.00   | 0.00   | 0.00   | 0.00   | 0.00  |
| Nonadecane                    | 1900 | 0.00  | 0.00   | 0.00   | 0.00  | 0.00   | 0.00  | 0.29   | 0.23   | 0.21   | 0.08   | 0.12   | 1.43  |
| Eicosane                      | 2000 | 0.00  | 0.00   | 0.00   | 0.00  | 0.00   | 0.00  | 0.18   | 0.15   | 0.13   | 0.05   | 0.07   | 1.43  |
| Heneicosane                   | 2100 | 0.00  | 0.00   | 0.00   | 0.00  | 0.00   | 0.00  | 0.00   | 0.00   | 0.00   | 0.00   | 0.00   | 0.00  |
| TOTAL OF IDENTIFIED COMPOUNDS |      | 197.4 | 199.08 | 198.52 | 197.7 | 194.12 | 196.9 | 198.48 | 199.84 | 206.66 | 198.74 | 124.58 | 48.21 |

**Table S3.** BVOCs content in *Picea abies* presented as the mean values with SD and CV. Values detected in tested genotypes (Gen 1; Gen 2; Gen 3); The data shows content of primary BVOCs determined in fresh herbal material (Headspace-GC/MS 1\*) and essential oils determined in essential oil (GC/MS Fresh\*\* and GC/MS Dry\*\*\*)

| Species                    | RI   | Picea abies* |        |        | Picea abies** |        |        | Picea abies*** |        |        | MEAN (%) | SD (%) | CV (%) |
|----------------------------|------|--------------|--------|--------|---------------|--------|--------|----------------|--------|--------|----------|--------|--------|
| Genotype                   |      | Gen. 1       | Gen. 2 | Gen. 3 | Gen. 1        | Gen. 2 | Gen. 3 | Gen. 1         | Gen. 2 | Gen. 3 |          |        |        |
| Monoterpene Hydrocarbons   |      | 90.01        | 84.86  | 89.81  | 0.83          | 0.52   | 0.39   | 0.00           | 0.00   | 0.00   | 29.60    | 41.48  | 1.40   |
| $\alpha$ -Pinene           | 937  | 23.59        | 21.46  | 23.29  | 0.00          | 0.00   | 0.00   | 0.00           | 0.00   | 0.00   | 7.59     | 10.75  | 1.42   |
| Camphene                   | 952  | 24.98        | 23.65  | 24.78  | 0.83          | 0.52   | 0.39   | 0.00           | 0.00   | 0.00   | 8.35     | 11.41  | 1.37   |
| $\beta$ -Pinene            | 979  | 13.63        | 13.69  | 15.21  | 0.00          | 0.00   | 0.00   | 0.00           | 0.00   | 0.00   | 4.73     | 6.70   | 1.42   |
| $\beta$ -Myrcene           | 991  | 5.64         | 6.78   | 4.74   | 0.00          | 0.00   | 0.00   | 0.00           | 0.00   | 0.00   | 1.91     | 2.74   | 1.44   |
| $\alpha$ -Phellandrene     | 1005 | 0.36         | 0.73   | 0.85   | 0.00          | 0.00   | 0.00   | 0.00           | 0.00   | 0.00   | 0.22     | 0.33   | 1.52   |
| 3-Carene                   | 1011 | 0.33         | 0.63   | 0.53   | 0.00          | 0.00   | 0.00   | 0.00           | 0.00   | 0.00   | 0.17     | 0.24   | 1.48   |
| $\alpha$ -Terpinene        | 1017 | 0.27         | 0.24   | 0.25   | 0.00          | 0.00   | 0.00   | 0.00           | 0.00   | 0.00   | 0.08     | 0.12   | 1.42   |
| o-Cymene                   | 1022 | 0.00         | 0.00   | 0.00   | 0.00          | 0.00   | 0.00   | 0.00           | 0.00   | 0.00   | 0.00     | 0.00   | 0.00   |
| Limonene                   | 1030 | 19.75        | 16.11  | 18.14  | 0.00          | 0.00   | 0.00   | 0.00           | 0.00   | 0.00   | 6.00     | 8.53   | 1.42   |
| $\beta$ -Ocimene           | 1037 | 0.48         | 0.38   | 0.56   | 0.00          | 0.00   | 0.00   | 0.00           | 0.00   | 0.00   | 0.16     | 0.23   | 1.44   |
| $\gamma$ -Terpinene        | 1060 | 0.31         | 0.39   | 0.6    | 0.00          | 0.00   | 0.00   | 0.00           | 0.00   | 0.00   | 0.14     | 0.22   | 1.50   |
| Terpinolene                | 1088 | 0.67         | 0.8    | 0.86   | 0.00          | 0.00   | 0.00   | 0.00           | 0.00   | 0.00   | 0.26     | 0.37   | 1.43   |
| Oxygenated Monoterpenes    |      | 6.78         | 11.37  | 12.82  | 23.26         | 25.48  | 27.21  | 26.06          | 26.67  | 40.64  | 22.25    | 9.75   | 0.44   |
| 1,8-Cineole                | 1032 | 4.9          | 4.54   | 7.11   | 0.00          | 0.00   | 0.00   | 0.00           | 0.00   | 0.00   | 1.84     | 2.68   | 1.46   |
| Linalool                   | 1099 | 0.16         | 0.53   | 0.33   | 0.21          | 0.18   | 0.11   | 0.00           | 0.00   | 0.00   | 0.17     | 0.17   | 0.98   |
| Camphor                    | 1145 | 0.19         | 2.02   | 2.53   | 0.09          | 0.12   | 0.09   | 0.00           | 0.00   | 0.00   | 0.56     | 0.93   | 1.65   |
| Camphene hydrate           | 1148 | 0.00         | 0.00   | 0.00   | 1.58          | 1.18   | 1.07   | 0.96           | 0.84   | 5.35   | 1.22     | 1.56   | 1.28   |
| Isoborneol                 | 1157 | 0.00         | 0.00   | 0.00   | 0.09          | 0.17   | 0.12   | 0.00           | 0.00   | 0.00   | 0.04     | 0.06   | 1.48   |
| Pinocarvone                | 1164 | 0.00         | 0.00   | 0.00   | 0.00          | 0.00   | 0.00   | 0.00           | 0.00   | 0.00   | 0.00     | 0.00   | 0.00   |
| endo-Borneol               | 1167 | 0.43         | 0.87   | 0.64   | 5.25          | 7.58   | 8.37   | 4.49           | 5.03   | 8.63   | 4.59     | 3.11   | 0.68   |
| Terpinen-4-ol              | 1177 | 0.11         | 0.28   | 0.36   | 0.25          | 0.34   | 0.8    | 0.00           | 0.00   | 1.29   | 0.38     | 0.39   | 1.03   |
| $\alpha$ -Terpineol        | 1189 | 0.41         | 0.32   | 0.67   | 1.18          | 2.13   | 2.31   | 1.43           | 1.78   | 6.57   | 1.87     | 1.80   | 0.96   |
| Citronellol                | 1228 | 0.00         | 0.00   | 0.00   | 0.65          | 0.87   | 0.72   | 0.00           | 0.00   | 0.00   | 0.25     | 0.36   | 1.43   |
| Bornyl acetate             | 1285 | 0.58         | 2.81   | 1.18   | 12.82         | 11.6   | 12.56  | 17.35          | 17.66  | 17.53  | 10.45    | 6.69   | 0.64   |
| $\alpha$ -Terpinyl acetate | 1350 | 0.00         | 0.00   | 0.00   | 0.96          | 1.02   | 0.91   | 1.83           | 1.36   | 1.27   | 0.82     | 0.63   | 0.77   |
| Eugenol                    | 1357 | 0.00         | 0.00   | 0.00   | 0.18          | 0.29   | 0.15   | 0.00           | 0.00   | 0.00   | 0.07     | 0.10   | 1.50   |
| trans-Pinocarvyl acetate   | 1297 | 0.00         | 0.00   | 0.00   | 0.00          | 0.00   | 0.00   | 0.00           | 0.00   | 0.00   | 0.00     | 0.00   | 0.00   |
| (-)-Myrtenol               | 1213 | 0.00         | 0.00   | 0.00   | 0.00          | 0.00   | 0.00   | 0.00           | 0.00   | 0.00   | 0.00     | 0.00   | 0.00   |
| Myrtenyl acetate           | 1327 | 0.00         | 0.00   | 0.00   | 0.00          | 0.00   | 0.00   | 0.00           | 0.00   | 0.00   | 0.00     | 0.00   | 0.00   |
| Sesquiterpene hydrocarbons |      | 1.31         | 2.34   | 1.33   | 13.19         | 14.94  | 15.56  | 27.25          | 25.62  | 24.54  | 14.01    | 9.91   | 0.71   |
| $\alpha$ -Copaene          | 1377 | 0.00         | 0.00   | 0.00   | 0.52          | 0.58   | 1.08   | 1.05           | 1.12   | 1.69   | 0.67     | 0.57   | 0.85   |
| $\alpha$ -Cubebene         | 1377 | 0.00         | 0.00   | 0.00   | 0.00          | 0.00   | 0.00   | 0.00           | 0.00   | 0.00   | 0.00     | 0.00   | 0.00   |
| Longifolene                | 1405 | 0.32         | 0.2    | 0.15   | 0.21          | 0.32   | 0.42   | 1.45           | 1.07   | 1.24   | 0.60     | 0.48   | 0.80   |
| trans-Caryophyllene        | 1419 | 0.53         | 0.96   | 0.65   | 0.38          | 0.46   | 0.63   | 8.56           | 8.27   | 7.98   | 3.16     | 3.62   | 1.15   |

|                               |      |       |        |        |       |        |        |        |        |       |        |        |       |
|-------------------------------|------|-------|--------|--------|-------|--------|--------|--------|--------|-------|--------|--------|-------|
| β- Copaene                    | 1432 | 0.00  | 0.00   | 0.00   | 0.00  | 0.00   | 0.00   | 0.00   | 0.00   | 0.00  | 0.00   | 0.00   | 0.00  |
| cis-β-Farnesene               | 1444 | 0.00  | 0.00   | 0.00   | 3.67  | 3.15   | 3.64   | 2.01   | 1.95   | 1.36  | 1.75   | 1.44   | 0.82  |
| Humulene                      | 1454 | 0.15  | 0.45   | 0.31   | 0.52  | 1.12   | 1.93   | 5.35   | 4.47   | 4.24  | 2.06   | 1.94   | 0.94  |
| allo-Aromadendrene            | 1460 | 0.00  | 0.00   | 0.00   | 2.95  | 1.25   | 0.98   | 0.00   | 0.00   | 0.00  | 0.58   | 0.96   | 1.66  |
| γ-Gurjunene                   | 1473 | 0.00  | 0.00   | 0.00   | 0.00  | 0.00   | 0.00   | 0.00   | 0.00   | 0.00  | 0.00   | 0.00   | 0.00  |
| γ-Muurolene                   | 1477 | 0.00  | 0.00   | 0.00   | 0.00  | 0.00   | 0.00   | 0.00   | 0.00   | 0.00  | 0.00   | 0.00   | 0.00  |
| γ-Himachalene                 | 1477 | 0.00  | 0.00   | 0.00   | 0.36  | 0.68   | 0.63   | 0.00   | 0.00   | 0.00  | 0.19   | 0.27   | 1.48  |
| Germacrene D                  | 1481 | 0.07  | 0.21   | 0.09   | 0.29  | 0.32   | 0.31   | 1.89   | 1.94   | 1.69  | 0.76   | 0.77   | 1.02  |
| α- Muurolene                  | 1499 | 0.00  | 0.00   | 0.00   | 0.27  | 0.4    | 0.32   | 2.74   | 2.87   | 3.17  | 1.09   | 1.31   | 1.21  |
| α- Farnesene                  | 1508 | 0.00  | 0.00   | 0.00   | 1.02  | 3.19   | 0.27   | 0.88   | 0.76   | 1.58  | 0.86   | 0.97   | 1.14  |
| β- Cadinene                   | 1518 | 0.24  | 0.52   | 0.13   | 2.01  | 2.45   | 3.7    | 3.32   | 3.17   | 1.59  | 1.90   | 1.29   | 0.68  |
| α-Calacorene                  | 1542 | 0.00  | 0.00   | 0.00   | 0.99  | 1.02   | 1.65   | 0.00   | 0.00   | 0.00  | 0.41   | 0.60   | 1.48  |
| γ-Cadinene                    | 1513 | 0.00  | 0.00   | 0.00   | 0.00  | 0.00   | 0.00   | 0.00   | 0.00   | 0.00  | 0.00   | 0.00   | 0.00  |
| Cubebol                       | 1516 | 0.00  | 0.00   | 0.00   | 0.00  | 0.00   | 0.00   | 0.00   | 0.00   | 0.00  | 0.00   | 0.00   | 0.00  |
| Oxygenated sesquiterpenes     |      | 0.00  | 0.00   | 0.00   | 0.00  | 66.75  | 63.91  | 53.57  | 53.24  | 40.22 | 38.01  | 27.90  | 0.73  |
| trans - Nerolidol             | 0.00 | 0.00  | 0.00   | 0.00   | 2.53  | 3.49   | 1.85   | 1.64   | 1.34   | 1.17  | 1.34   | 1.15   | 0.86  |
| Spathulenol                   | 0.00 | 0.00  | 0.00   | 0.00   | 14.02 | 11.47  | 14.73  | 12.4   | 12.8   | 9.48  | 8.32   | 6.05   | 0.73  |
| caryophyllene oxide           | 0.00 | 0.00  | 0.00   | 0.00   | 8.37  | 8.23   | 4.46   | 6.63   | 5.38   | 5.03  | 4.23   | 3.24   | 0.77  |
| Cubenol                       | 0.00 | 0.00  | 0.00   | 0.00   | 1.87  | 2.65   | 1.93   | 1.07   | 1.14   | 1.03  | 1.08   | 0.90   | 0.84  |
| Epicubenol                    | 0.00 | 0.00  | 0.00   | 0.00   | 0.31  | 0.48   | 0.74   | 0.54   | 0.35   | 0     | 0.27   | 0.27   | 0.99  |
| epi-α-muurolol                | 0.00 | 0.00  | 0.00   | 0.00   | 11.73 | 10.79  | 8.48   | 11.04  | 14.19  | 8.23  | 7.16   | 5.33   | 0.74  |
| α-Cadinol                     | 0.00 | 0.00  | 0.00   | 0.00   | 18.21 | 17.72  | 20.08  | 7.87   | 6.98   | 5.14  | 8.44   | 7.78   | 0.92  |
| Aliphatic compounds           | 0.00 | 0.00  | 0.00   | 0.00   | 5.96  | 5.82   | 6.19   | 5.53   | 5.07   | 5.07  | 3.58   | 2.62   | 0.73  |
| Nonanal                       | 0.00 | 0.00  | 0.00   | 0.00   | 0.43  | 0.98   | 0.78   | 0.97   | 0.88   | 0.67  | 0.52   | 0.40   | 0.77  |
| n-Dodecanol                   | 0.00 | 0.00  | 0.00   | 0.00   | 0.55  | 0.41   | 0.56   | 0.54   | 0.47   | 0.11  | 0.29   | 0.24   | 0.83  |
| Hexadecane                    | 0.00 | 0.00  | 0.00   | 0.00   | 1.38  | 2.36   | 3.15   | 2.52   | 2.31   | 2.11  | 1.54   | 1.17   | 0.76  |
| Heptadecane                   | 0.00 | 0.00  | 0.00   | 0.00   | 0.00  | 0.00   | 0.00   | 0.00   | 0.00   | 0.00  | 0.00   | 0.00   | 0.00  |
| Nonadecane                    | 0.00 | 0.00  | 0.00   | 0.00   | 0.00  | 0.00   | 0.00   | 0.00   | 0.00   | 0.00  | 0.00   | 0.00   | 0.00  |
| Eicosane                      | 0.00 | 0.00  | 0.00   | 0.00   | 0.58  | 1.39   | 1.02   | 1.18   | 1.11   | 1.5   | 0.75   | 0.58   | 0.78  |
| Heneicosane                   | 0.00 | 0.00  | 0.00   | 0.00   | 0.75  | 0.82   | 0.31   | 0.98   | 0.76   | 0.68  | 0.48   | 0.38   | 0.79  |
| TOTAL OF IDENTIFIED COMPOUNDS |      | 196.2 | 197.14 | 207.92 | 203.4 | 215.38 | 214.14 | 213.76 | 211.06 | 210.8 | 207.76 | 193.48 | 56.72 |
